# Supplementary material
Source: PubMed Central journal article supplement (PMC8162930)
Supplement: NIHMS1702790-supplement-Supplementary_Figure_1.pdf [file NIHMS1702790-supplement-Supplementary_Figure_1.pdf]

Prostatectomy  
n=2,380

Clinical Exclusion Criteria:

- Salvage (cysto-)prostatectomy, n=64
- Palliative prostatectomy, n=1
- Cysto-prostatectomy for cT4 cancer, n=1
- Neoadjuvant systemic therapy, n=73

MR-Imaging Exclusion Criteria:

- No dedicated prostate MRI, n=4
- MRI on film only, n=16
- No endorectal coil, n=38

No follow-up data available, n=23

Final Study Cohort  
n=2,160

Radiation Therapy  
n=1,906

Clinical Exclusion Criteria:

- Salvage radiation therapy, n=302
- Palliative radiation therapy, n=49
- Neoadjuvant cytotoxic chemotherapy, n=10
- Neoadjuvant hormonal therapy prior to MRI, n=222

MR-Imaging Exclusion Criteria:

- No dedicated prostate MRI, n=8
- MRI on film only, n=15
- No endorectal coil, n=29
- Nondiagnostic MRI quality, n=1

No follow-up data available, n=24

Final Study Cohort  
n=1,246
